# Supplementary material for: A randomized phase II clinical trial of dendritic cell vaccination following complete resection of colon cancer liver metastasis
Source: PubMed Central journal article supplement (PMC6164167; doi:10.1186/s40425-018-0405-z), 2018-09-29

A

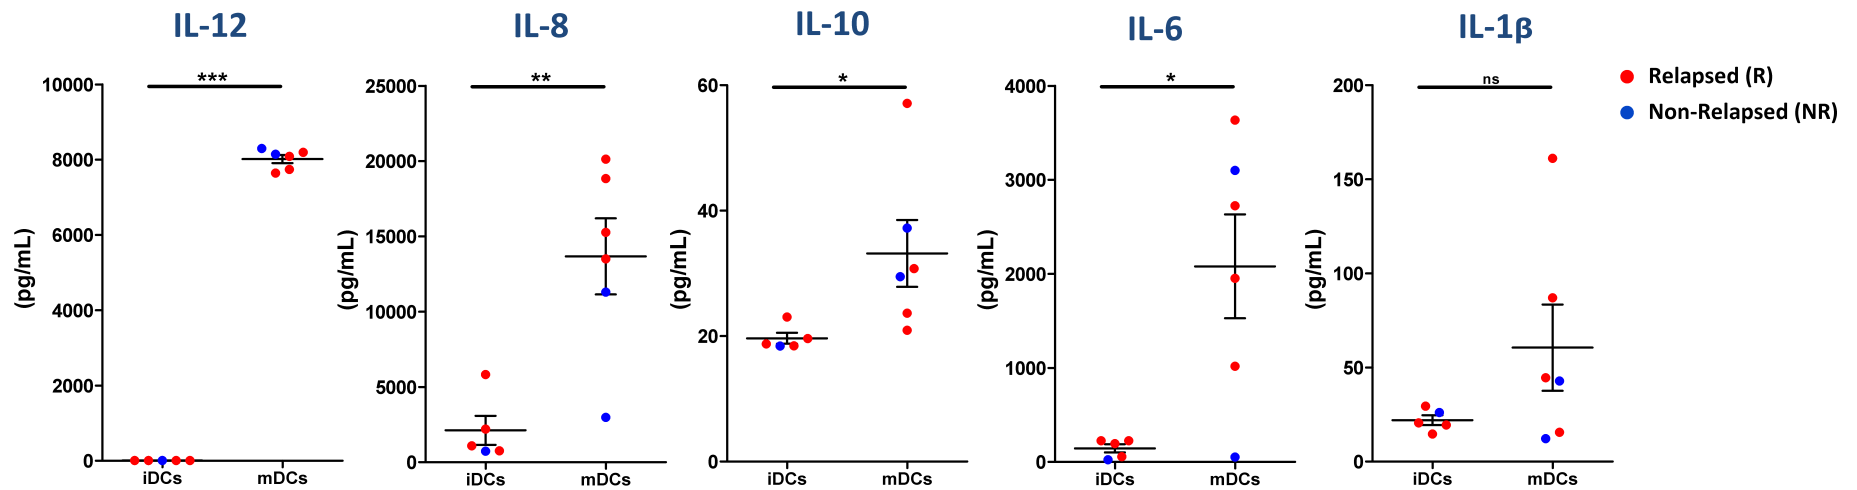

B

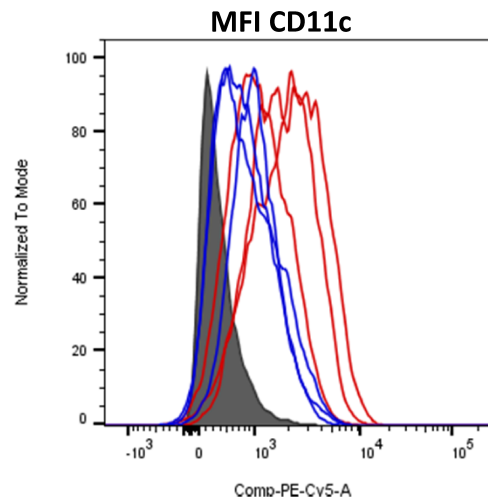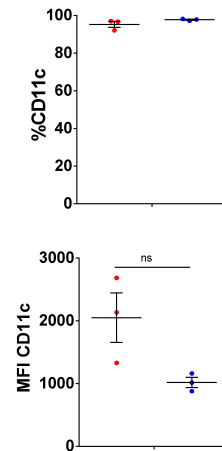

Supplement: 40425_2018_405_MOESM1_ESM.pdf [file 40425_2018_405_MOESM1_ESM.pdf]
