# Supplementary material for: A randomized phase II clinical trial of dendritic cell vaccination following complete resection of colon cancer liver metastasis
Source: PubMed Central journal article supplement (PMC6164167; doi:10.1186/s40425-018-0405-z), 2018-09-29
Supplement: 40425_2018_405_MOESM2_ESM.pdf [file 40425_2018_405_MOESM2_ESM.pdf]

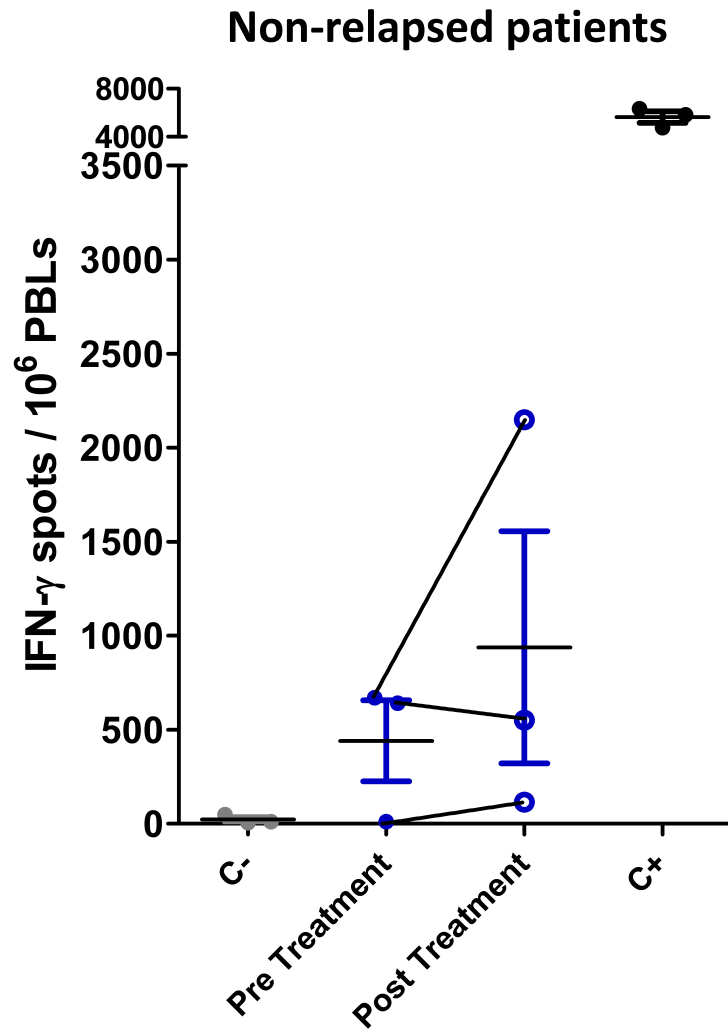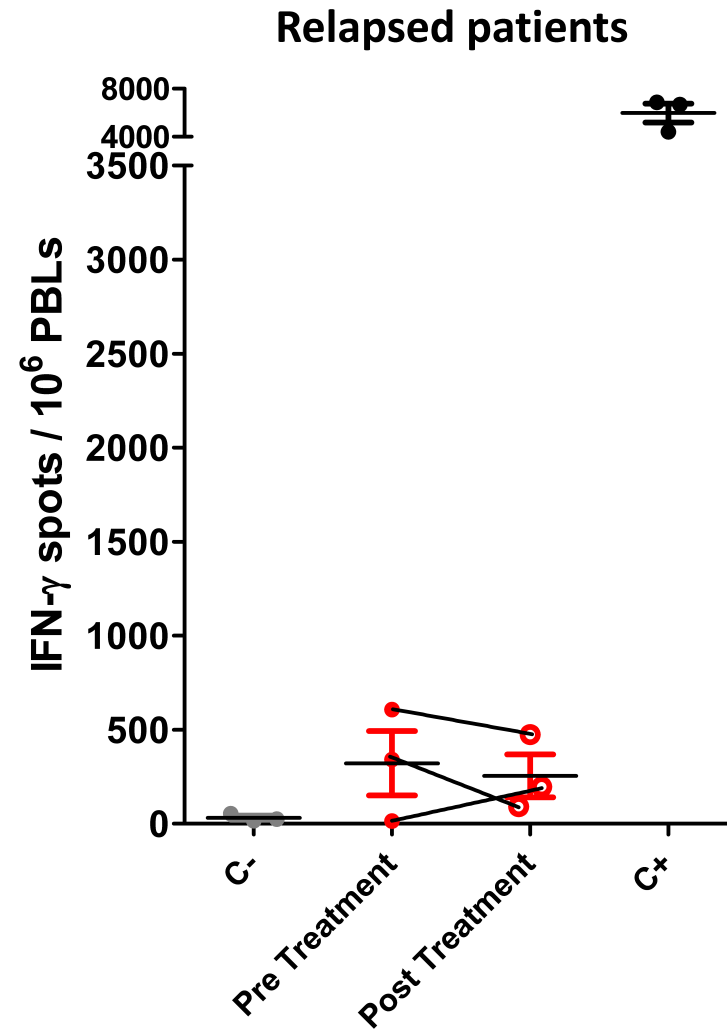

**INF- $\gamma$  ELISPOTS analyses.** Frozen DC and sequential PBMC samples were available from six treated cases including three relapsed and three non-relapsed. PBMC obtained pre-treatment (apheresis date) and post-treatment (four weeks after finishing the second treatment cycle) were pulsed with autologous tumor lysate to evaluate IFN- $\gamma$ -producing spots. Positive control (C+) was SEB and culture medium was used as negative control (C-). Non-relapsed patients are presented on the left graph and relapsed cases on the right graph.
